# Supplementary material
Source: publisher figshare collection journal article supplement (https://acs.figshare.com/ndownloader/files/22108449)
Supplement: Supplementary file 1 [file 22108449]

Supplementary Information

**Invigorating the Catalytic Activity of Cobalt Selenide via Structural Phase Transition Engineering for Lithium-Oxygen Battery**

Minglu Li<sup>a</sup>, Chaozhu Shu<sup>\*a</sup>, Anjun Hu<sup>b</sup>, Jiabao Li<sup>a</sup>, Ranxi Liang<sup>a</sup>, Jianping Long<sup>\*a</sup>

<sup>a</sup>College of Materials and Chemistry & Chemical Engineering, Chengdu University of Technology, 1#, Dongsanlu, Erxianqiao, Chengdu 610059, Sichuan, P. R. China

<sup>b</sup>State Key Laboratory of Electronic Thin Films and Integrated Devices, University of Electronic Science and Technology of China, Chengdu, 610054, Sichuan, P. R. China

\*Corresponding author:

Email: czshu@imr.ac.cn (Chaozhu Shu); longjianping@cdut.cn (Jianping Long)

The number of pages: 14 (S1-S14)

The number of Figures: 15 (Figures S1-S15)

The number of Tables: 4 (Tables S1-S4)

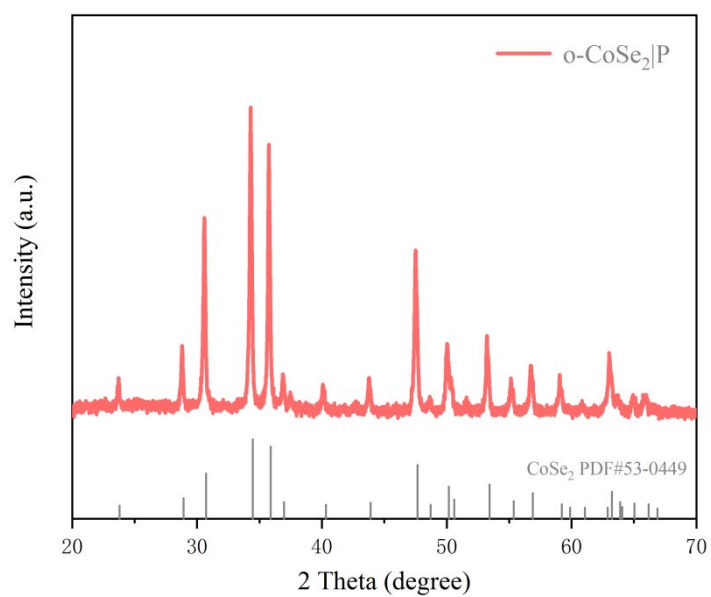

Figure S1 XRD patterns of the o-CoSe<sub>2</sub>|P.

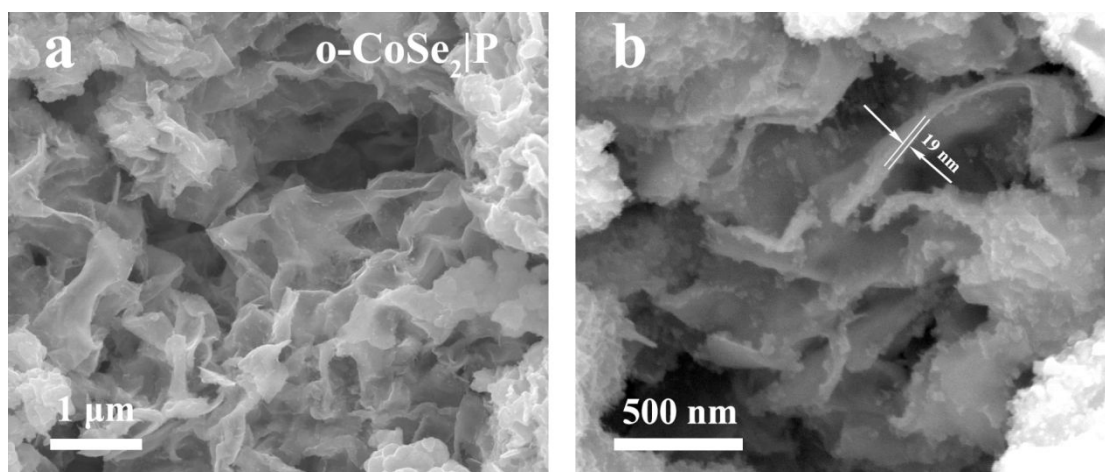

Figure S2 a) and b) SEM image of o-CoSe<sub>2</sub>|P nanobelts. o-CoSe<sub>2</sub>|P maintains an excellent nanobelt structure with a thickness of about 19 nm.

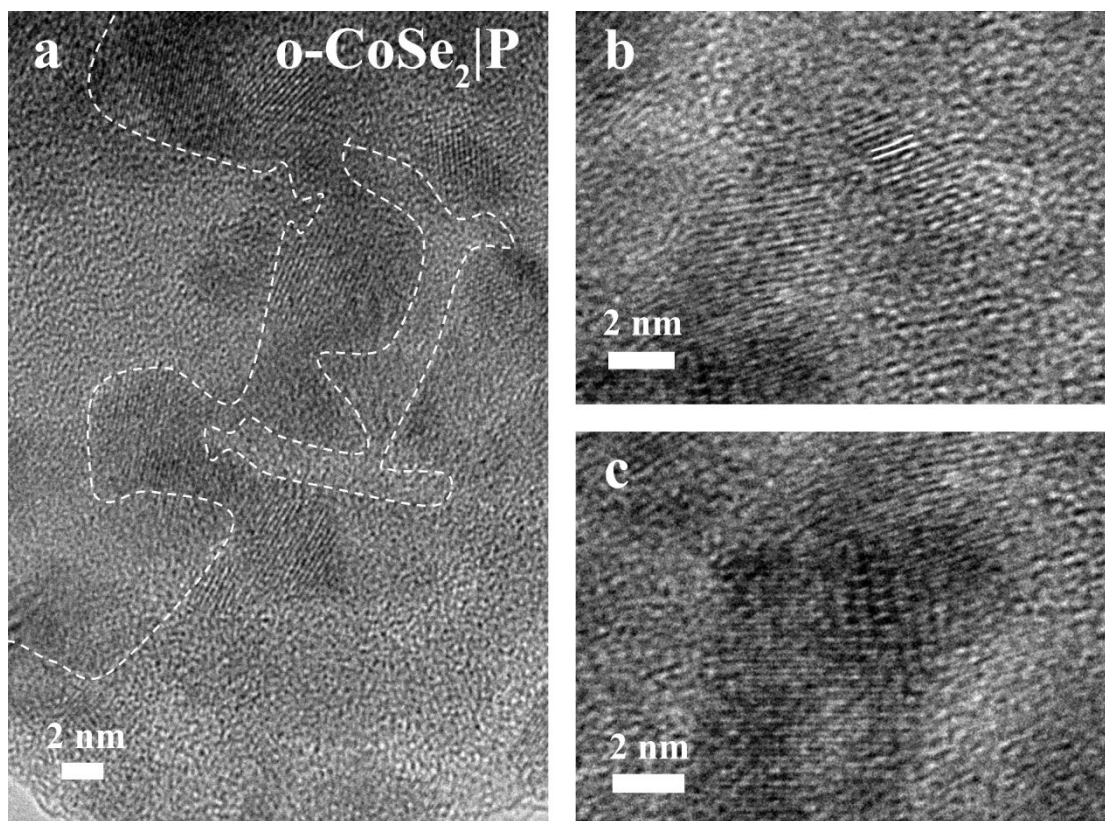

Figure S3 a)-c) High-resolution TEM (HRTEM) images of o-CoSe<sub>2</sub>|P. HRTEM image of o-CoSe<sub>2</sub>|P shows defects around the edge of the hole. These defects are caused by heat treatment and bond rotation during the phase change, which creates more active sites and is beneficial for OER catalysis.

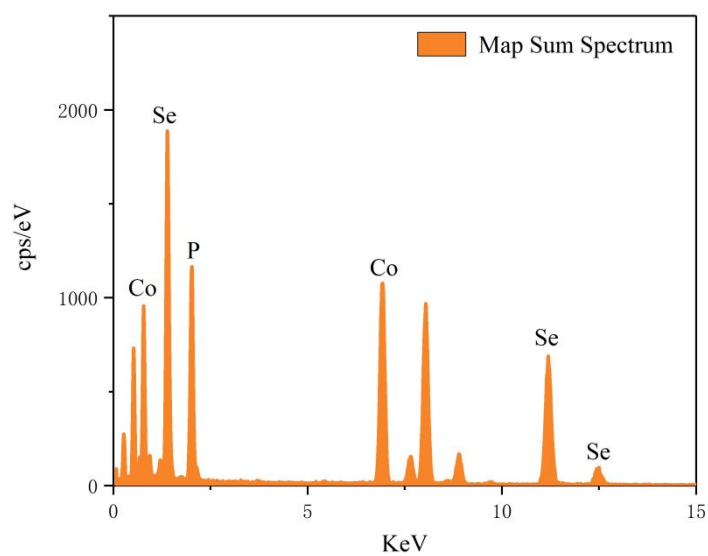

Figure S4 EDX pattern of o-CoSe<sub>2</sub>|P.

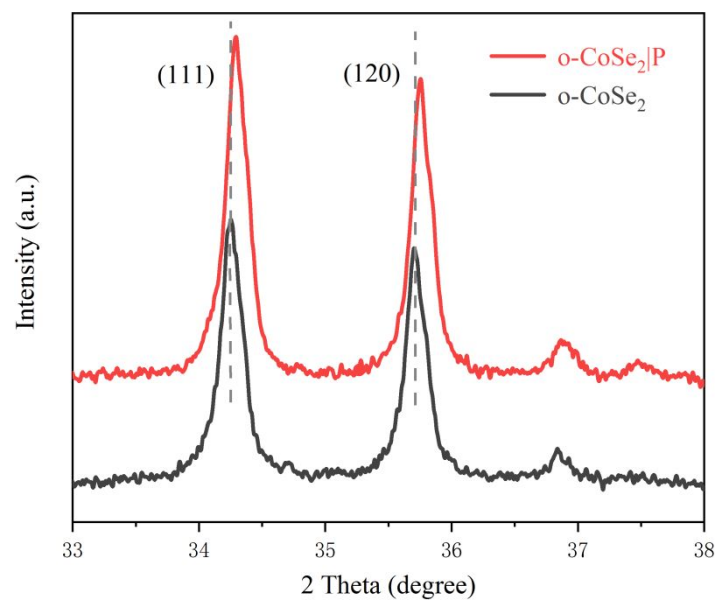

Figure S5 XRD pattern of orthogonal phase o-CoSe<sub>2</sub> without P doping and o-CoSe<sub>2</sub>|P (JCPDS: 53-0449).

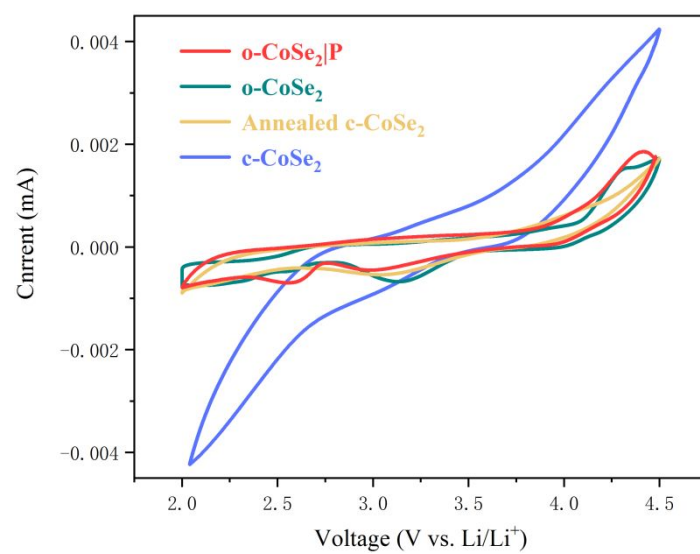

Figure S6 CV curves of the Li-O<sub>2</sub> batteries based on o-CoSe<sub>2</sub>|P, o-CoSe<sub>2</sub>, annealed c-CoSe<sub>2</sub> and c-CoSe<sub>2</sub> electrodes.

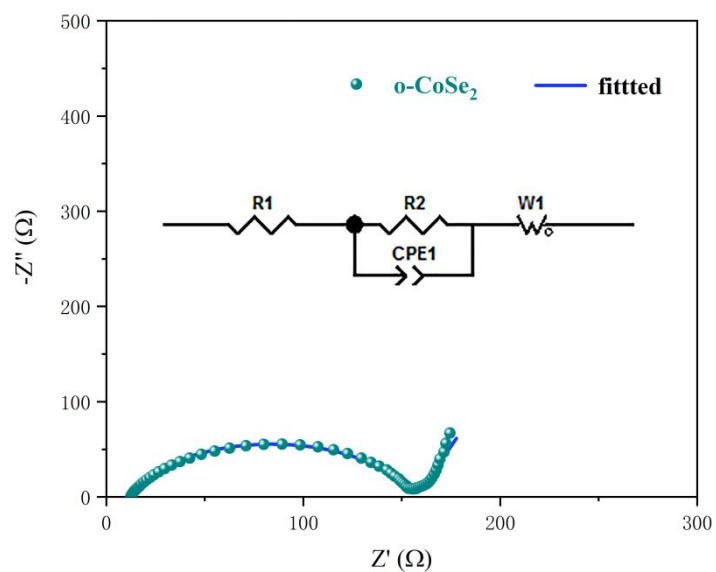

Figure S7 Nyquist plots of Li-O<sub>2</sub> batteries based on o-CoSe<sub>2</sub> electrodes.

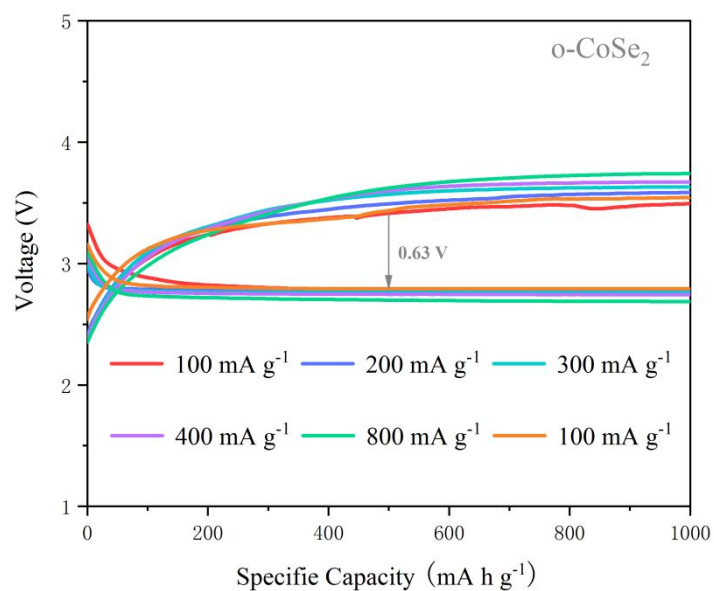

Figure S8 Rate capability of Li-O<sub>2</sub> batteries with annealed o-CoSe<sub>2</sub>.

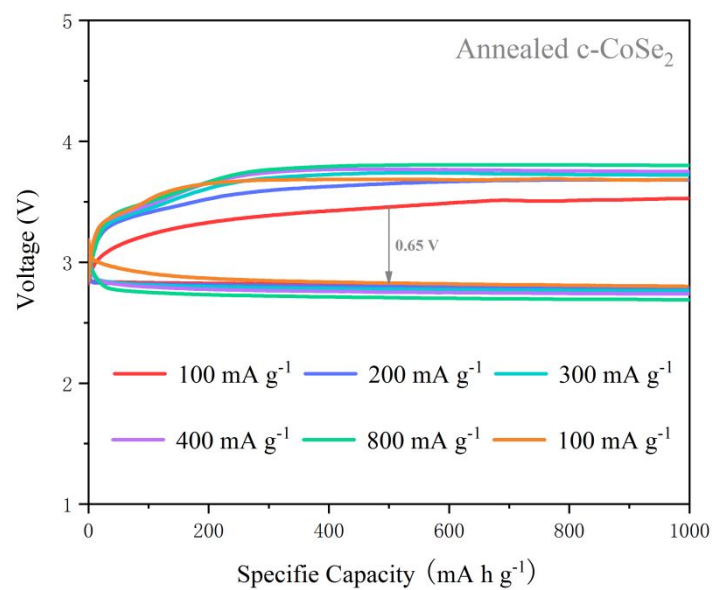

Figure S9 Rate capability of Li-O<sub>2</sub> battery with annealed c-CoSe<sub>2</sub>.

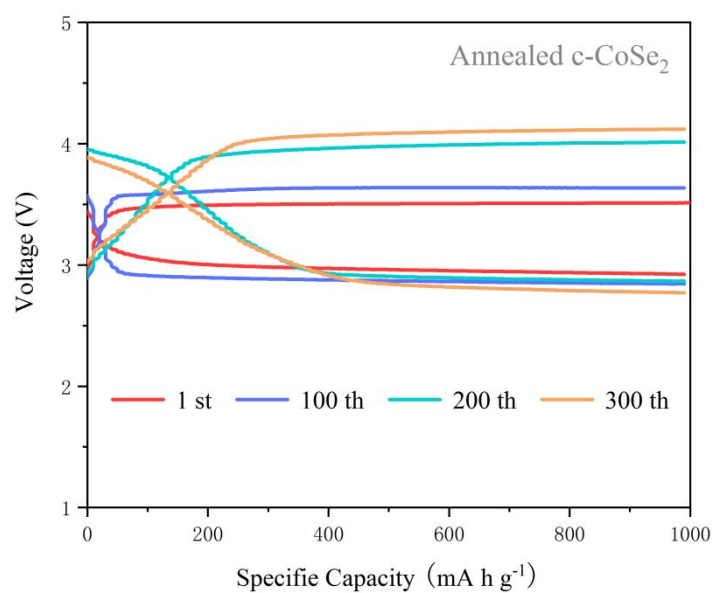

Figure S10 Discharge and charge curves of Li-O<sub>2</sub> batteries with annealed c-CoSe<sub>2</sub>.

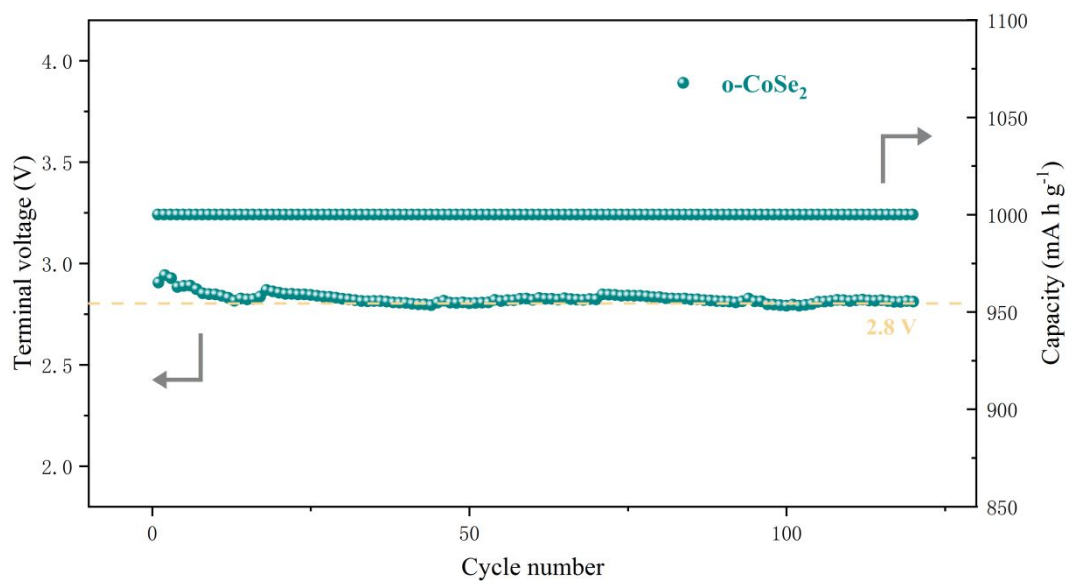

Figure S11 Cycling performance of Li-O<sub>2</sub> batteries with o-CoSe<sub>2</sub> with a limited capacity of 1000 mA h g<sup>-1</sup> at a current density of 50 mA g<sup>-1</sup>.

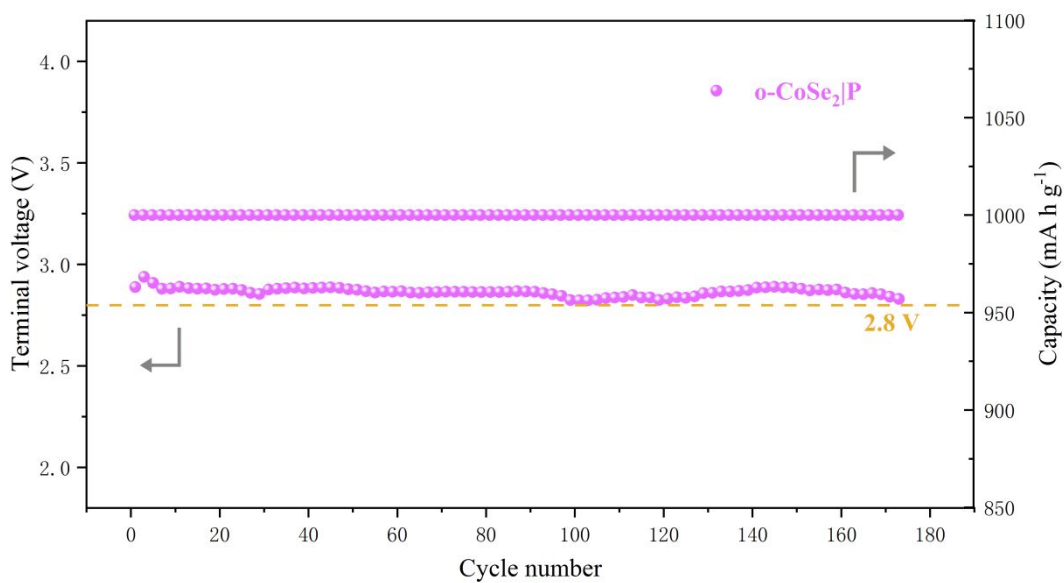

Figure S12 Cycling performance of Li-O<sub>2</sub> battery based on o-CoSe<sub>2</sub>|P electrode at a current density of 200 mA g<sup>-1</sup> with a limited specific capacity of 1000 mA h g<sup>-1</sup>.

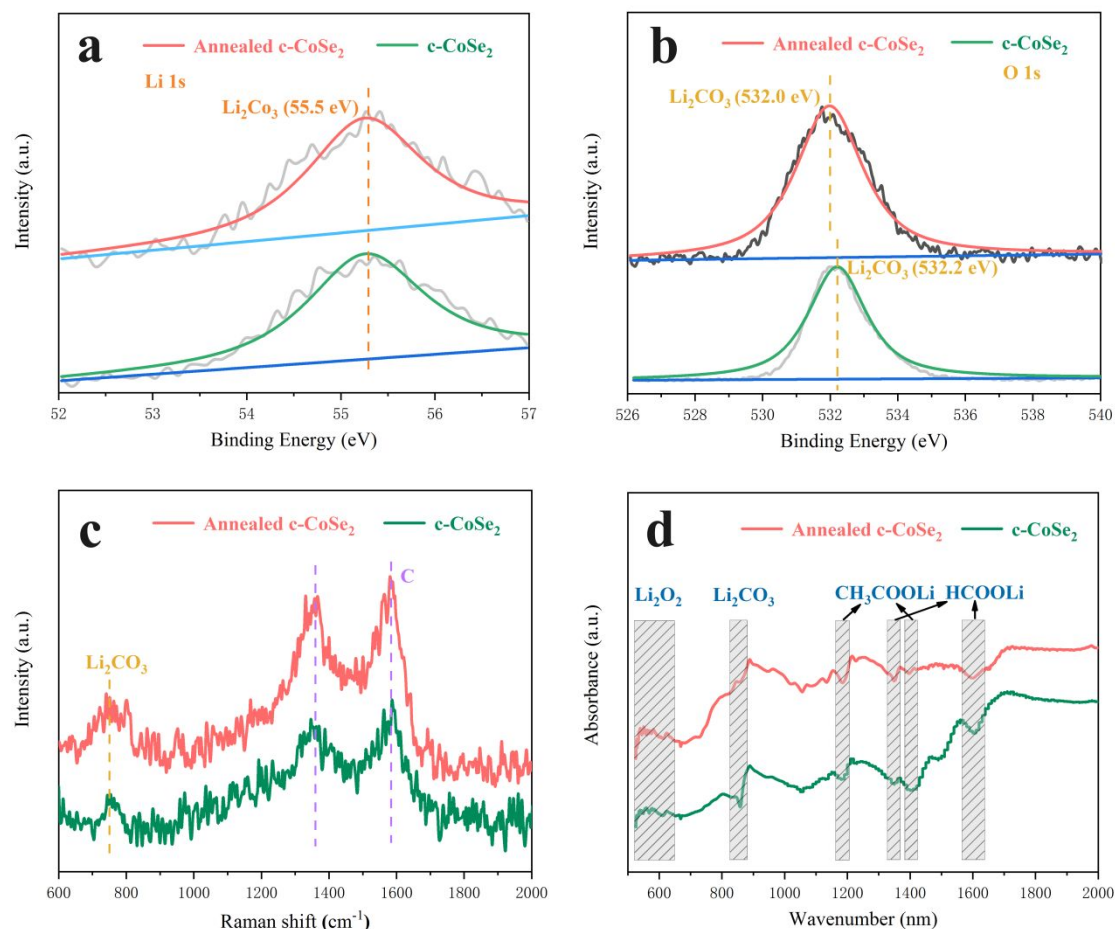

Figure S13 a) Li 1s XPS spectra, b) O 1s XPS spectra, c) Raman spectra and d) FTIR spectra of annealed c-CoSe<sub>2</sub> and c-CoSe<sub>2</sub> after 100 cycles.

As shown in Fig S13a, the Li 1S XPS spectra of the c-CoSe<sub>2</sub> and annealed c-CoSe<sub>2</sub> oxygen electrodes show peaks at about 55.5eV and 56.3eV after 100 cycles, which can be assigned to the discharged by-product Li<sub>2</sub>CO<sub>3</sub> after cycling. In the O 1S XPS (Fig S13b), the characteristic peaks of c-CoSe<sub>2</sub> and annealed c-CoSe<sub>2</sub> oxygen electrode after 100 cycles at about 532.0 eV can be attributed to discharge by-product Li<sub>2</sub>CO<sub>3</sub>. For the Raman spectra shown in Fig S11c, the c-CoSe<sub>2</sub> and annealed c-CoSe<sub>2</sub> oxygen electrodes show the characterization peak at about 749 cm<sup>-1</sup> after 100 cycles, corresponding to the harmful by-products Li<sub>2</sub>CO<sub>3</sub> generated after cycling. The peaks at 1352 cm<sup>-1</sup> and 1580 cm<sup>-1</sup> can be attributed to the carbon cloth substrate.

In order to better understand the discharged by-products on the electrode surface after cycling, Fourier transform infrared spectrum (FTIR) characterization on c-CoSe<sub>2</sub> and annealed c-CoSe<sub>2</sub> oxygen electrodes after 100 cycles was further carried out. The

different peaks around 400~600  $\text{cm}^{-1}$  in the FTIR spectra shown in Fig S13d are due to the reversible formation and decomposition of  $\text{Li}_2\text{O}_2$  on the surface of the c-CoSe<sub>2</sub> and annealed c-CoSe<sub>2</sub> oxygen electrodes. However, a characteristic absorption peak at 870  $\text{cm}^{-1}$  was found in both electrodes and could be assigned to  $\text{Li}_2\text{CO}_3$ <sup>S10</sup>. The main reason for the formation of  $\text{Li}_2\text{CO}_3$  is the oxidation of carbon substrate during the charging process. Moreover,  $\text{Li}_2\text{CO}_3$  and other organic lithium salts ( $\text{CH}_3\text{COOLi}$ ,  $\text{HCOOLi}$ ) (1190  $\text{cm}^{-1}$  and 1400  $\text{cm}^{-1}$ , 1350  $\text{cm}^{-1}$  and 1600  $\text{cm}^{-1}$ ) will cover the effective surface area for the formation and decomposition of  $\text{Li}_2\text{O}_2$ <sup>S1</sup>. In addition, as the cycle progresses,  $\text{Li}_2\text{CO}_3$  and organolithium salts will gradually deposit on the oxygen electrode because these lithium salts are difficult to decomposition during charging. Finally, the active surface area will be totally covered and the passivation of the electrode surface will take place, leading to the death of the of c-CoSe<sub>2</sub> and annealed c-CoSe<sub>2</sub> electrodes<sup>S2</sup>

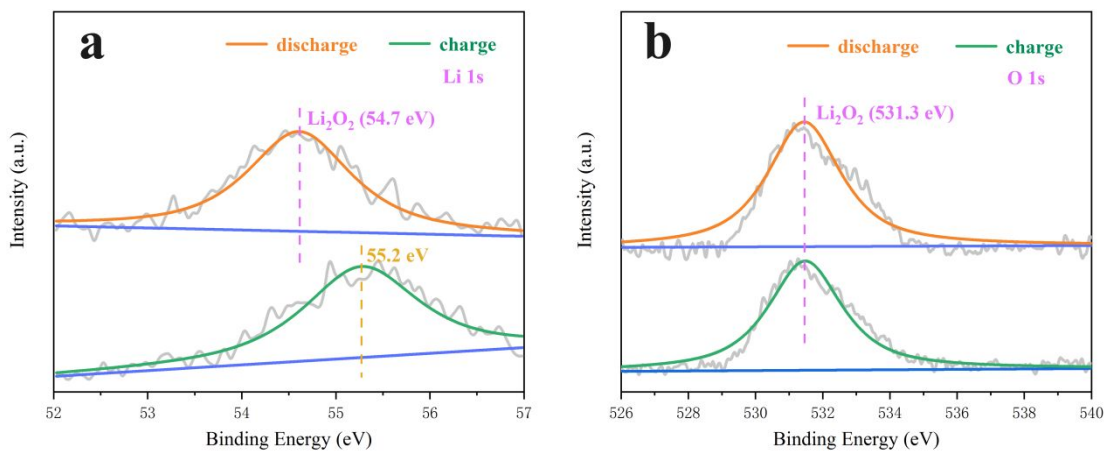

Figure S14 a) Li 1s XPS spectra and b) O 1s XPS spectra of o-CoSe<sub>2</sub>|P after discharge and after charge.

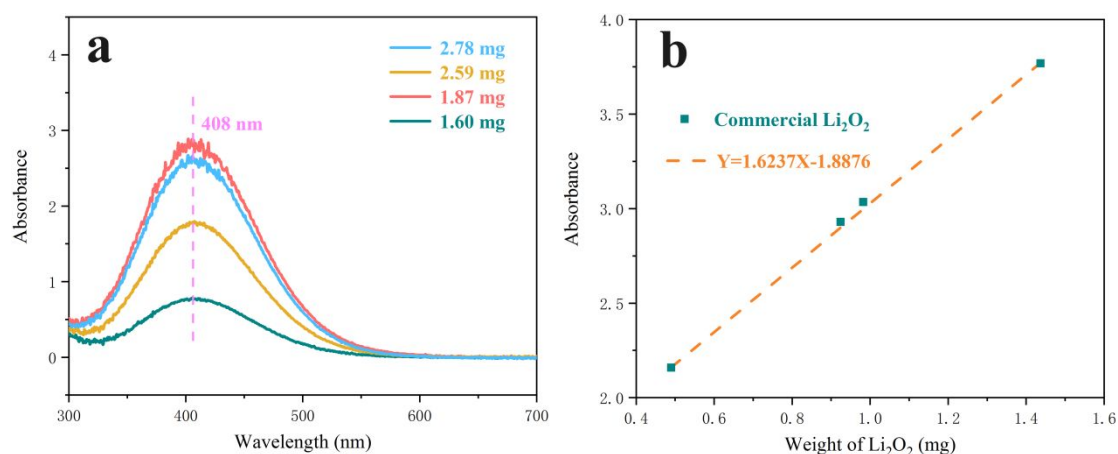

Figure S15 a) UV-Vis spectra of  $\text{TiOSO}_4$  titration solution with different amount of commercial  $\text{Li}_2\text{O}_2$ . b) The fitted line and the corresponding linear equation.

Table S1. Corresponding element ratio of o- $\text{CoSe}_2|\text{P}$ .

| Element | Wt%   |
|---------|-------|
| P       | 18.34 |
| Co      | 35.67 |
| Se      | 45.99 |

Table S2. Impedance parameters of the Li- $\text{O}_2$  battery after fitting raw data to an equivalent circuit.

| Catalyst                    | R1    | R2    |
|-----------------------------|-------|-------|
| o- $\text{CoSe}_2 \text{P}$ | 13.3  | 118.3 |
| o- $\text{CoSe}_2$          | 13.5  | 136.5 |
| Annealed c- $\text{CoSe}_2$ | 12    | 138   |
| c- $\text{CoSe}_2$          | 60.62 | 178.9 |

Table S3. The amount of  $\text{Li}_2\text{O}_2$  on the oxygen electrode at different discharge capacity.

| Discharge capacity<br>(mA h) | Calculated $\text{Li}_2\text{O}_2$<br>weight (mg) | Titrated weight of<br>$\text{Li}_2\text{O}_2$ (mg) | Yield (%) |
|------------------------------|---------------------------------------------------|----------------------------------------------------|-----------|
| 2.5                          | 2.14                                              | 1.60                                               | 74.77     |
| 3                            | 3.57                                              | 1.87                                               | 72.83     |
| 3.5                          | 3.00                                              | 2.59                                               | 86.45     |
| 4                            | 3.42                                              | 2.78                                               | 81.20     |

Table S4. Performance comparison of Li- $\text{O}_2$  batteries based on different oxygen electrodes.

| Sample                                  | Current density              | Cut-off<br>voltage<br>(V) | Limited<br>capacity<br>(mA h g <sup>-1</sup> ) | Number<br>of cycles | Ref.         |
|-----------------------------------------|------------------------------|---------------------------|------------------------------------------------|---------------------|--------------|
| o-CoSe <sub>2</sub>  P                  | 50<br>mA g <sup>-1</sup>     | 2                         | 1000                                           | 500                 | This<br>work |
| $\delta$ -MnO <sub>2</sub><br>nanoboxes | 0.08<br>mA cm <sup>-2</sup>  | 2                         | 1000                                           | 113                 | S3           |
| $\delta$ -MnO <sub>2</sub> /G           | 0.333<br>mA cm <sup>-2</sup> | 2.0                       | 492                                            | 132                 | S4           |
| $\varepsilon$ -MnO <sub>2</sub>         | 500<br>mA g <sup>-1</sup>    | 2.2                       | 800                                            | 190                 | S5           |
| 3D hollow<br>$\alpha$ -MnO <sub>2</sub> | 200<br>mA g <sup>-1</sup>    | 2.2                       | 1000                                           | 170                 | S6           |
| Co-Mn-O<br>nanocube                     | 0.16<br>mA cm <sup>-2</sup>  | >2.0                      | 500                                            | 100                 | S7           |
| Co@PNCS                                 | 250<br>mA g <sup>-1</sup>    | 2.3                       | 600                                            | 120                 | S8           |

|                                                          |                            |      |       |     |     |
|----------------------------------------------------------|----------------------------|------|-------|-----|-----|
| Co <sub>3</sub> O <sub>4</sub> /GN                       | 300<br>mA g <sup>-1</sup>  | ≈2.7 | 1500  | 42  | S9  |
| CuCr <sub>2</sub> O <sub>4</sub> @r<br>GO                | 200<br>mA g <sup>-1</sup>  | 2    | 1000  | 100 | S10 |
| Co <sub>3</sub> O <sub>4</sub> -TiO <sub>2</sub> (<br>B) | 100<br>mA g <sup>-1</sup>  | ≈2.6 | 1000  | 200 | S11 |
| Co@N-C<br>microspheres                                   | 0.1<br>mA cm <sup>-2</sup> | 2.2  | 500   | 40  | S12 |
| nitrogen-dop<br>ed LaNiO <sub>3</sub>                    | 250<br>mA g <sup>-1</sup>  | 2.6  | 500   | 50  | S13 |
| NiO                                                      | 0.1<br>mA cm <sup>-2</sup> | 2.3  | 800   | 50  | S14 |
| CoSe <sub>2</sub><br>@G-C <sub>3</sub> N <sub>4</sub>    | 0.3<br>mA cm <sup>-2</sup> | 2    | <1000 | 30  | S15 |
| 3D<br>M-MoSSe                                            | 50<br>mA g <sup>-1</sup>   | 2.4  | <1000 | 30  | S16 |
| 5%Pt+5%Cu                                                | 100<br>mA g <sup>-1</sup>  | 2.2  | 500   | 50  | S17 |

Note: G=graphene, PNCS=N-porous doped carbon nanosheets, GN=graphene nanosheets.

By comparing the performance of Li-O<sub>2</sub> batteries based on different oxygen electrodes, it can be found that the o-CoSe<sub>2</sub>|P based Li-O<sub>2</sub> battery proposed in this work demonstrates much better cycle stability as compared to previous reported metal oxides such as MnO<sub>2</sub>, Co<sub>3</sub>O<sub>4</sub>, NiO and metal selenides such as CoSe<sub>2</sub>, MoSe<sub>2</sub>. Thus,

comparing with previous reported oxygen electrodes, the o-CoSe<sub>2</sub>|P oxygen electrode demonstrates much obvious competitiveness, thus providing a new strategy for developing efficient oxygen electrode for Li-O<sub>2</sub> battery. We have added the above discussion to the supporting information (Table S4).

## Reference

- (S1) Zhang, P.; Zhang, S.; He, M.; Lang, J.; Ren, A.; Xu, S.; Yan, X. Realizing the Embedded Growth of Large Li<sub>2</sub>O<sub>2</sub> Aggregations by Matching Different Metal Oxides for High-Capacity and High-Rate Lithium Oxygen Batteries. *Adv. Sci.* **2017**, *4*, 1700172, DOI 10.1002/advs.201700172.
- (S2) Wang, P.; Li, C.; Dong, S.; Ge, X.; Zhang, P.; Miao, X.; Wang, R.; Zhang, Z.; Yin, L. Hierarchical NiCo<sub>2</sub>S<sub>4</sub>@NiO Core-Shell Heterostructures as Catalytic Cathode for Long-Life Li-O<sub>2</sub> Batteries. *Adv. Energy Mater.* **2019**, *9*, 1900788, DOI 10.1002/aenm.201900788.
- (S3) Zhang, J.; Luan, Y.; Lyu, Z.; Wang, L.; Xu, L.; Yuan, K.; Pan, F.; Lai, M.; Liu, Z.; Chen, W. Synthesis of Hierarchical porous δ-MnO<sub>2</sub> Nanoboxes as an Efficient Catalyst for Rechargeable Li-O<sub>2</sub> Batteries. *Nanoscale* **2015**, *7*, 14881–14888, DOI 10.1039/C5NR02983J.
- (S4) Liu, S.; Zhu, Y.; Xie, J.; Huo, Y.; Yang, H. Y.; Zhu, T.; Cao, G.; Zhao, X.; Zhang, S. Direct Growth of Flower-Like δ-MnO<sub>2</sub> on Three-Dimensional Graphene for High-Performance Rechargeable Li-O<sub>2</sub> Batteries. *Adv. Energy Mater.* **2014**, *4*, 1301960, DOI 10.1002/aenm.201301960.
- (S5) Hu, X.; Cheng, F.; Han, X.; Zhang, T.; Chen, J. Oxygen Bubble-Templated Hierarchical Porous ε-MnO<sub>2</sub> as a Superior Catalyst for Rechargeable Li-O<sub>2</sub> Batteries. *Small* **2015**, *11*, 809–813, DOI 10.1002/smll.201401790.
- (S6) Bi, R.; Liu, G.; Zeng, C.; Wang, X.; Zhang, L.; Qiao, S. Z. 3D Hollow α-MnO<sub>2</sub> Framework as an Efficient Electrocatalyst for Lithium-Oxygen Batteries. *Small* **2019**, *15*, 1804958, DOI 10.1002/smll.201804958.
- (S7) Zhang, J.; Wang, L.; Xu, L.; Ge, X.; Zhao, X.; Lai, M.; Liu, Z.; Chen, W. Porous Cobalt-Manganese Oxide Nanocubes Derived from Metal Organic Frameworks as a Cathode Catalyst for Rechargeable Li-O<sub>2</sub> Batteries. *Nanoscale* **2015**, *7*, 720–726, DOI 10.1039/C4NR05865H.
- (S8) Zhai, Y.; Wang, J.; Gao, Q.; Fan, Y.; Hou, C.; Hou, Y.; Liu, H.; Shao, Q.; Wu, S.; Zhao, L. Highly Efficient Cobalt Nanoparticles Anchored Porous N-doped Carbon Nanosheets Electrocatalysts for Li-O<sub>2</sub> Batteries. *J. Catal.* **2019**, *377*, 534–542, DOI 10.1016/j.jcat.2019.07.055.
- (S9) Yuan, M.; Yang, Y.; Nan, C.; Sun, G.; Li, H.; Ma, S. Porous Co<sub>3</sub>O<sub>4</sub> Nanorods Anchored on Graphene Nanosheets as an Effective Electrocatalysts for Aprotic Li-O<sub>2</sub> Batteries. *Appl. Surf. Sci.* **2018**, *444*, 312–319, DOI 10.1016/j.apsusc.2018.02.267.
- (S10) Liu, J.; Zhao, Y.; Li, X.; Wang, C.; Zeng, Y.; Yue, G.; Chen, Q. CuCr<sub>2</sub>O<sub>4</sub>@rGO Nanocomposites as High-Performance Cathode Catalyst for Rechargeable Lithium-Oxygen Batteries. *Nano-Micro Lett.* **2018**, *10*, 22, DOI 10.1007/s40820-017-0175-z.

- (S11) Wang, G.; Zhang, S.; Qian, R.; Wen, Z. Atomic-Thick TiO<sub>2</sub> (B) Nanosheets Decorated with Ultrafine Co<sub>3</sub>O<sub>4</sub> Nanocrystals As a Highly Efficient Catalyst for Lithium–Oxygen Battery. *ACS Appl. Mater. Interfaces* **2018**, *10*, 41398–41406, DOI 10.1021/acsami.8b15774.
- (S12) Song, J.; Lv, X.; Jiao, Y.; Wang, P.; Xu, M.; Li, T.; Chen, X.; Li, J.; Zhang, Z. Catalyst Nanoarchitecturing via Functionally Implanted Cobalt Nanoparticles in Nitrogen Doped Carbon Host for Aprotic Lithium–Oxygen Batteries. *J. Power Sources* **2018**, *394*, 122–130, DOI 10.1016/j.jpowsour.2018.05.058.
- (S13) Zhang, J.; Zhang, C.; Li, W.; Guo, Q.; Gao, H.; You, Y.; Li, Y.; Cui, Z.; Jiang, K.-C.; Long, H. Nitrogen–Doped Perovskite as a Bifunctional Cathode Catalyst for Rechargeable Lithium–Oxygen Batteries. *ACS Appl. Mater. Interfaces* **2018**, *10*, 5543–5550, DOI 10.1021/acsami.7b17289.
- (S14) Dong, H.; Tang, P.; Zhang, S.; Xiao, X.; Jin, C.; Gao, Y.; Yin, Y.; Li, B.; Yang, S. Excellent oxygen evolution reaction of NiO with a layered nanosphere structure as the cathode of lithium–oxygen batteries. *RSC Adv.* **2018**, *8*, 3357–3363, DOI 10.1039/C7RA12630A.
- (S15) Kumar, S.; Jena, A.; Hu, Y. C.; Liang, C.; Zhou, W.; Hung, T. F.; Chang, W. S.; Chang, H.; Liu, R. S. Cobalt Diselenide Nanorods Grafted on Graphitic Carbon Nitride: A Synergistic Catalyst for Oxygen Reactions in Rechargeable Li–O<sub>2</sub> Batteries. *ChemElectroChem* **2018**, *5*, 29–35, DOI 10.1002/celec.201700909.
- (S16) Zhang, S.; Huang, Z.; Wen, Z.; Zhang, L.; Jin, J.; Shahbazian-Yassar, R.; Yang, J. Local lattice distortion activate metastable metal sulfide as catalyst with stable full discharge–charge capability for Li–O<sub>2</sub> batteries. *Nano Lett.* **2017**, *17*, 3518–3526, DOI 10.1021/acs.nanolett.7b00603.
- (S17) Luo, X.; Ge, L.; Ma, L.; Kropf, A. J.; Wen, J.; Zuo, X.; Ren, Y.; Wu, T.; Lu, J.; Amine, K. Effect of Componential Proportion in Bimetallic Electrocatalysts on the Aprotic Lithium–Oxygen Battery Performance. *Adv. Energy Mater.* **2018**, *8*, 1703230, DOI 10.1002/aenm.201703230.
